# Supplementary material for: BIM-Enabled Design Collaboration Processes in Remote Architectural Practice and Education in Australia
Source: Atypon-hosted journal article supplement (doi:10.1061/jaeied.aeeng-1505), 2022-12-02
Supplement: supplemental materials_jaeied.aeeng-1505_peng.pdf [file supplemental%20materials_jaeied.aeeng-1505_peng.pdf]

## SUPPLEMENTAL MATERIALS

*ASCE Journal of Architectural Engineering*

# BIM-Enabled Design Collaboration Processes in Remote Architectural Practice and Education in Australia

Ju Hyun Lee, Michael J. Ostwald, Samaneh Arasteh, and Philip  
Oldfield

**DOI:** 10.1061/JAEIED.AEENG-1505

© ASCE 2023

[www.ascelibrary.org](http://www.ascelibrary.org)

## Eleven interview questions and their variations

### ***(i) BIM adoption and design process***

- 1. Could you please explain your design process (workflow) using BIM?**
  - 1-1. Could you please explain your *remote design process* (workflow) using BIM?
  - 1-2. Could you please explain your *remote design process* (workflow) in the other classes *without BIM*?
- 2. Do you have any BIM modelling principles?**
  - 2-1. How could remote teamwork improve or worsen your current design process (workflow) in respect of design representation?
  - 2-2. How could remote teamwork improve or worsen team/your creativity?
- 3. How could you improve your current design process (workflow) in respect of coordination?**
  - 3-1. How could remote teamwork improve or worsen your current design process (workflow) in respect of teamwork coordination?
- 4. How could you improve your current design process (workflow) in respect of design communication?**
  - 4-1. How could remote teamwork improve or worsen team interaction?
  - 4-2. Verbal communication?
  - 4-3. Non-verbal communication?
- 5. How could you improve your current design process (workflow) in respect of design collaboration?**

### ***(ii) Design and information management***

- 6. How could BIM tools improve or worsen your design collaboration?**
  - 6-1. From schematic design, design development to final documentation?
  - 6-2. Have you used other tools for project management or design collaboration? Why?
  - 6-3. How could the other online tools improve or worsen your design collaboration?
- 7. How can BIM improve your design information management?**
- 8. How could remote teamwork improve or worsen team/your productivity?**

### ***(iii) Technical and non-technical issues.***

- 9. Could you please describe any technical issues of BIM application in architectural practice? e.g., standard, data exchange and security**
  - 9-1. Please describe any technical issues of remote teamwork in architectural practice.
- 10. Could you please describe non-technical issues of BIM application in architectural practice? e.g., role, training and culture**
  - 10-1. Please describe any non-technical issues of remote teamwork in architectural practice.
  - 10-2. How could remote teamwork improve or worsen the operations of the team?
  - 10-3. Your team culture?
- 11. Do you have any additional comments on BIM practice and education?**
  - 11-1. How to improve BIM practice and education
  - 11-2. Do you have any additional comments on remote teamwork?
  - 11-3. How to improve online design practice and education?
